# Supplementary material for: Halogen bonding driven crystal engineering of iodophthalonitrile derivatives
Source: Royal Society of Chemistry journal article supplement (doi:10.1039/c8ce00594j), 2018-01-01
Supplement: c8ce00594j1.pdf [file c8ce00594j1.pdf]

# Halogen Bonding Driven Crystal Engineering of Iodophthalonitrile Derivatives

Özge Dilara Ateş,<sup>a</sup> Yunus Zorlu,<sup>a</sup> Sibel Demir Kanmazalp,<sup>b,c</sup> Yurii Chumakov,<sup>b</sup> Ayşe Gül  
Gürek<sup>a</sup> Mehmet Menaf Ayhan,<sup>a</sup> \*

<sup>a</sup>Department of Chemistry, Gebze Technical University, Gebze, 41400 Turkey

<sup>b</sup>Department of Physics, Gebze Technical University, Gebze, 41400 Turkey

<sup>c</sup>Technical Science Vocational School, Gaziantep University, 27310, Gaziantep, Turkey

## Experimental Procedure:

All chemicals were purchased from commercial sources and used without further purification.

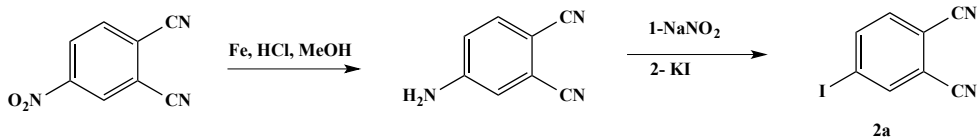

**4-Aminophthalonitrile:** 4-Nitrophthalonitrile (0.44 g, 2.5 mmol) was added to a mixture of methanol (10 mL) and concentrated hydrochloric acid (3 mL) and stirred at 70 °C. Iron powder (0.6 g) was added in small portions over 45 min. After 1h, the mixture was poured into cold water and the precipitate filtered off. Yellowish solid (0.3 g, 82 %). <sup>1</sup>H NMR (CDCl<sub>3</sub>): δ = 4.31 (s, 2H), 6.84 (d, 1H), 6.94 (d, 1H), 7.51 (d, 1H).

**4-Iodophthalonitrile (2a):** 4-Aminophthalonitrile (0.2 g, 1.4 mmol) was added to mixture of concentrated hydrochloric acid (6 mL), ice (20 g) and sodium nitrite (0.15 g, 2.15 mmol) in water (3 mL) in one portion at 5°C. After 2 hours, the solution was filtered. The diazonium salt solution was added dropwise to a stirred cool solution of potassium iodide in 5 mL water. The resulting dark brown mixture was stirred for 1 hour. Compound was extracted with toluene from mixture solution. Then organic phase was washed with cold water and cold 5 % NaHCO<sub>3</sub>, then saturated Na<sub>2</sub>S<sub>2</sub>O<sub>3</sub> (sat). The toluene solution was dried over anhydrous sodium sulfate. White solid (0.25g, 70 %) <sup>1</sup>H NMR (d<sub>6</sub>-DMSO): δ = 7.86 (d, 1H), 8.25 (dd, 1H), 8.59 (d,1H). <sup>13</sup>C NMR (d<sub>6</sub>-DMSO): δ = 102.56, 110.01, 114.28, 115.36, 116.14, 135.01, 142.30, 143.38.

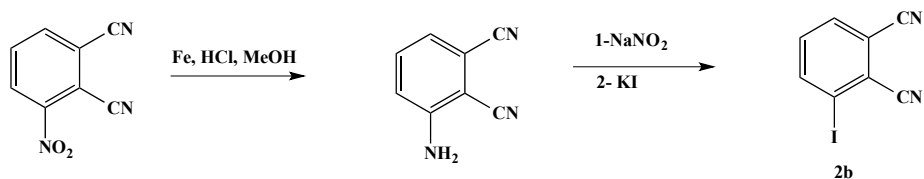

**3-Aminophthalonitrile:** 3-Nitrophthalonitrile (0.44 g, 2.5 mmoles) was added to a mixture of methanol (10 mL) and concentrated hydrochloric acid (3 mL) and stirred at 70 °C. Iron powder (0.6 g) was added in small portions over 45 min. After 1h, the mixture was poured into cold water and the precipitate filtered off. Yellow solid (0.25g, 70%). <sup>1</sup>H NMR (CDCl<sub>3</sub>): δ = 4.73 (s, 2H), 6.97 (d, 1H), 7.09 (d, 1H), 7.41 (t, 1H).

**3-Iodophthalonitrile (2b):** 3-Aminophthalonitrile (0.2 g, 1.4 mmoles) was added to mixture of concentrated hydrochloric acid (6 mL), ice (20 g) and sodium nitrite (0.15 g, 2.15 mmol) in water (3 mL) in one portion at 5°C. After 2 hours, the solution was filtered. The diazonium salt solution was added

dropwise to a stirred cool solution of potassium iodide in 5 mL water. The resulting dark brown mixture was stirred for 1 hour. Compound was extracted with toluene from mixture solution. Then organic phase was washed with cold water and cold 5 % NaHCO<sub>3</sub>, then saturated Na<sub>2</sub>S<sub>2</sub>O<sub>3</sub> (sat). The toluene solution was dried over anhydrous sodium sulfate. White solid (0.2g, 56 %) <sup>1</sup>H NMR (CDCl<sub>3</sub>): δ = 7.41 (t, 1H), 7.80 (m, 1H), 8.18 (m, 1H). <sup>13</sup>C NMR (CDCl<sub>3</sub>): δ = 144.25, 136.43, 132.81, 125.74, 118.65, 116.80, 116.40, 102.82.

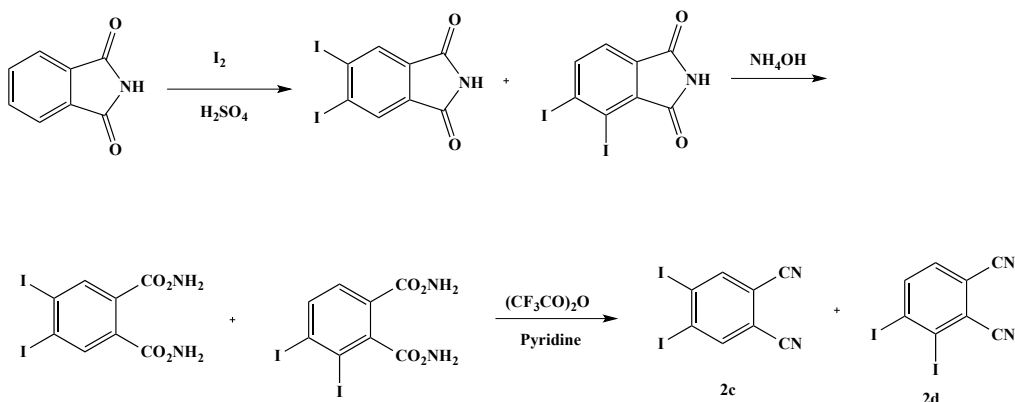

**4,5-Diiodophthalimide and 3,4-Diiodophthalimide:** A mixture of oleum (15 ml, 30%), phthalimide (10 g, 0.07 mol) and I<sub>2</sub> (17.2 g, 0.07 mol) was stirred and heated at 90 °C for 24 h. The resulting suspension was poured over ice, the precipitate was filtered, washed with water (50 ml), 4% aq. K<sub>2</sub>CO<sub>3</sub> (50 ml) and aq. Na<sub>2</sub>SO<sub>3</sub> (50 ml). The crude product was recrystallized from acetone/water to give 18.1 g (65 %) mixture of 4,5-diiodophthalimide and 3,4-diiodophthalimide as an off-white solid. The mixture compounds were used without further purifications.

**4,5-Diiodophthaldiamide and 3,4-Diiodophthaldiamide:** A mixture of 4,5 diiodophthalimide and 3,4-diiodophthalimide (5.3 g, 13.2 mmol) and aq. NH<sub>4</sub>OH (60ml, 25%) was stirred and heated at 60 °C for 1.5 h. The resulting suspension was filtered, the precipitate was washed with cold water (50 ml), methanol (50 ml) and air-dried to give 3.8 g (70 %) mixture of 4,5-Diiodophthaldiamide and 3,4-Diiodophthaldiamide as a white solid. The mixture compounds were used without further purifications.

**4,5-Diiodophthalonitrile (2c) and 3,4-Diiodophthalonitrile (2d):** Trifluoroacetic anhydride (10.6 ml, 75 mmol) was added dropwise to a mixture of 4,5-Diiodophthaldiamide and 3,4-Diiodophthaldiamide (5.5 g, 13 mmol), dioxane (100 ml) and pyridine (15 ml) at 0–5 °C. The resulting suspension was stirred at 25 °C for 12 h, poured over ice and extracted with ethyl acetate (100 ml). The combined organic extracts were washed with water (50 ml), 1M HCl (55 ml), aq. Na<sub>2</sub>CO<sub>3</sub> (150 ml), water (50 ml) and dried (Na<sub>2</sub>SO<sub>4</sub>). The solvents were evaporated in vacuum and the residue was crystallized from acetone/water to give mixture of 4,5-diiodophthalonitrile (2c) and 3,4-diiodophthalonitrile (2d). These compounds were separated using silica gel chromatography with ethyl acetate-hexane (1:9) as eluent. 4,5-diiodophthalonitrile (2c) (2.96 g, 60% yield) and 3,4-diiodophthalonitrile (2d) (0.5 g, 10% yield):

**4,5-Diiodophthalonitrile (2c):** IR: 2231 (CN)  $\text{cm}^{-1}$ .  $^1\text{H}$ NMR ( $d_1$ - $\text{CDCl}_3$ ):  $\delta = 8.24$  ppm (s, 2H).  $^{13}\text{C}$ -NMR ( $\text{CDCl}_3$ ): 142.68, 115.32, 114.95, 113.38 ppm. MALDI-MS (DHB)  $m/z$ : 416.8607 ( $[\text{M}+\text{H}]^+$ )

**3,4-Diiodophthalonitrile(2d):** IR: 2236 (CN)  $\text{cm}^{-1}$ .  $^1\text{H}$ NMR ( $d_1$ - $\text{CDCl}_3$ ):  $\delta = 8.22$  (d, 1H), 7.46 (d, 1H).  $^{13}\text{C}$ -NMR ( $\text{CDCl}_3$ ):  $\delta = 144.54, 133.63, 126.72, 116.52, 115.83, 115.91, 113.14, 110.64$ . MALDI-MS (DHB)  $m/z$ : 416.6 ( $[\text{M}+\text{H}]^+$ )

**1a**

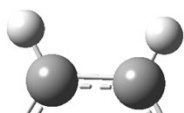

**1b**

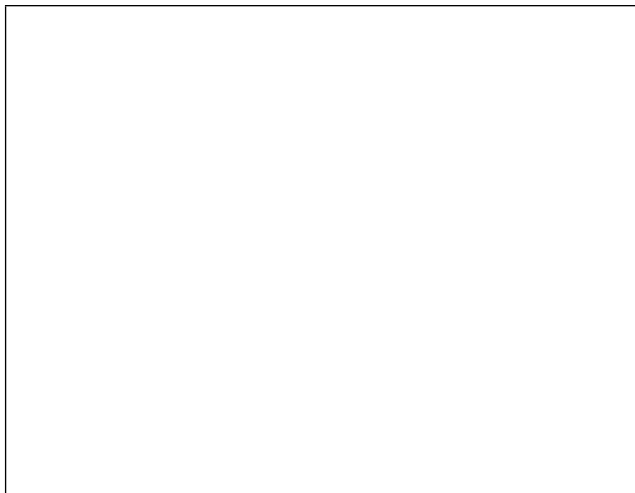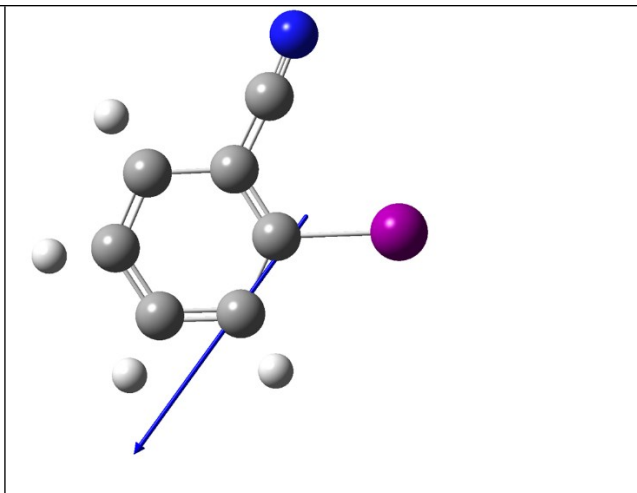

1c

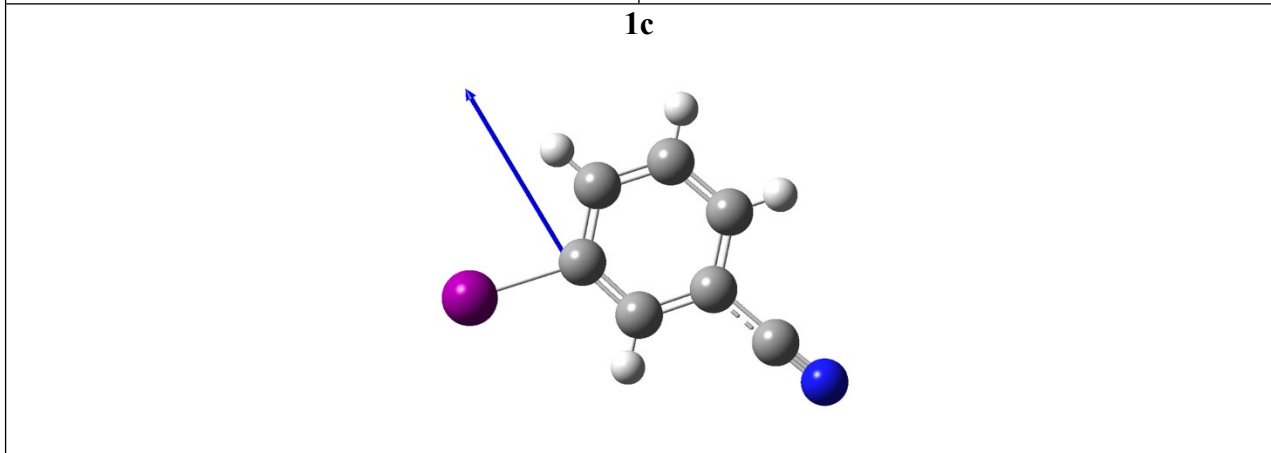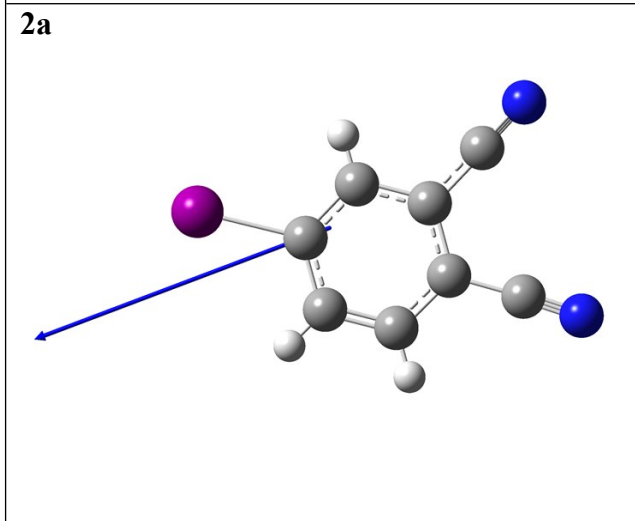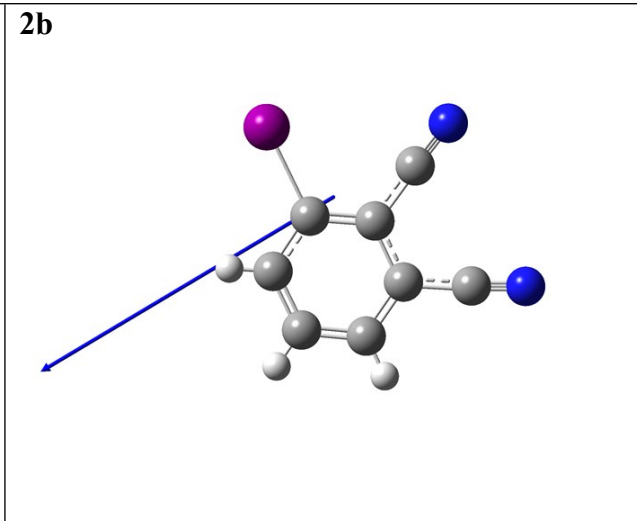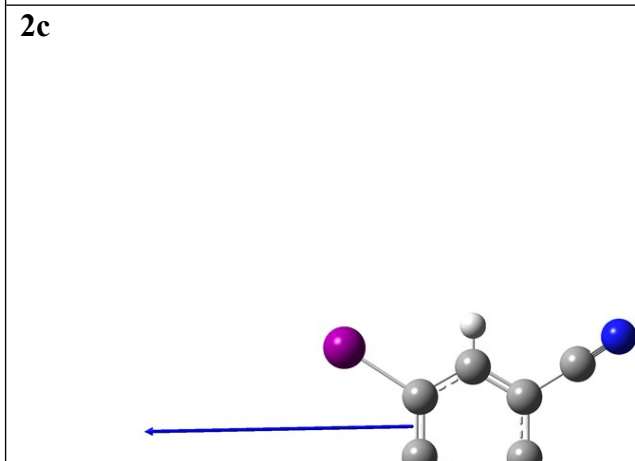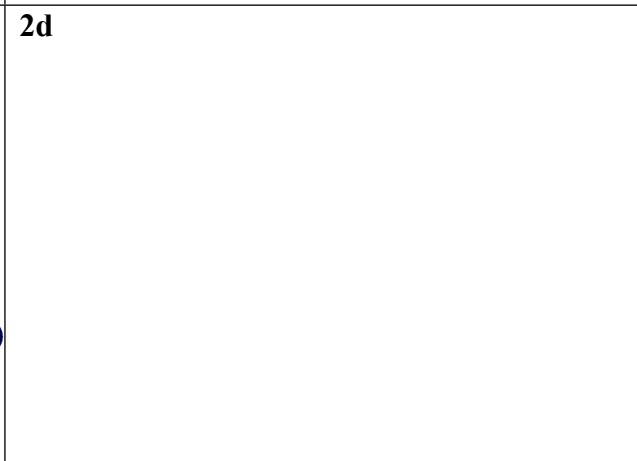

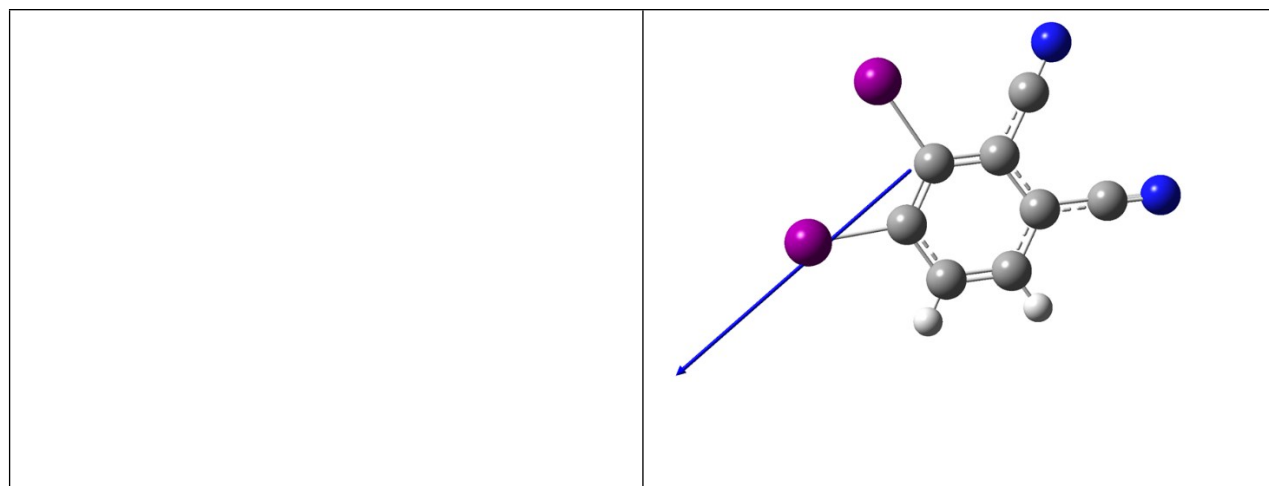

**Figure S1.** The orientation of monomers' dipole moments in **1a-1c. 2a-2d.**

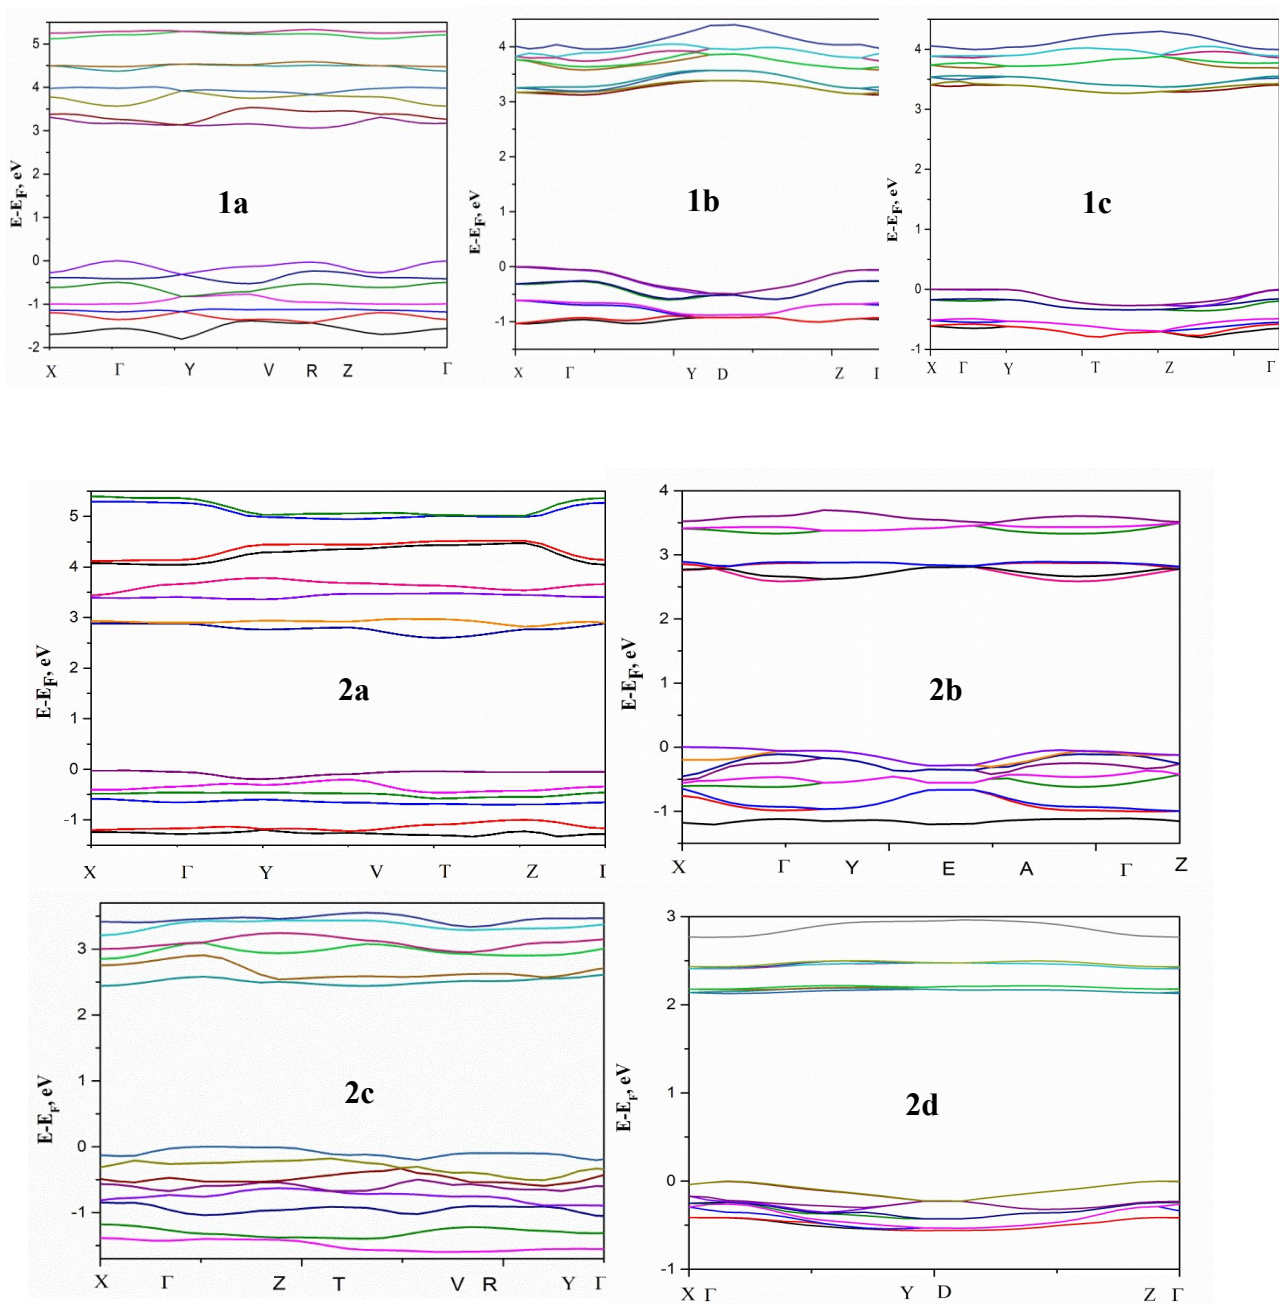

**Figure S2.** Band structures of the titled compounds. The reciprocal coordinates of high-symmetry points are **(1a)**  $X = (0.5, 0, 0)$ ,  $\Gamma = (0, 0, 0)$ ,  $Y = (0, 0.5, 0)$ ,  $V = (0.5, 0.5, 0)$ ,  $R = (0.5, 0, 0.5)$ ,  $Z = (0, 0, 0.5)$ ; **(1b)**  $X = (0.5, 0, 0)$ ,  $\Gamma = (0, 0, 0)$ ,  $Y = (0, 0.5, 0)$ ,  $D = (0, 0.5, 0.5)$ ,  $Z = (0, 0, 0.5)$ ; **(1c)**  $X = (0.5, 0, 0)$ ,  $\Gamma = (0, 0, 0)$ ,  $Y = (0, 0.5, 0)$ ,  $T = (0, 0.5, 0.5)$ ,  $Z = (0, 0, 0.5)$ ; **(2a)**  $X =$

$(0.5, 0, 0)$ ,  $\Gamma=(0, 0, 0)$ ,  $Y=(0, 0.5, 0)$ ,  $V=(0.5, 0.5, 0)$ ,  $T = (0.5, 0, 0.5)$ ,  $Z = (0, 0, 0.5)$ , **(2b)**  $X =$   
 $(0.5, 0, 0)$ ,  $\Gamma=(0, 0, 0)$ ,  $Y=(0, 0.5, 0)$ ,  $E=(0.5, 0.5, 0.5)$ ,  $A = (0.5, 0, 0.5)$ ,  $Z=(0, 0, 0.5)$ , **(2c)**  $X =$   
 $(0.5, 0, 0)$ ,  $\Gamma=(0, 0, 0)$ ,  $Z = (0, 0, 0.5)$ ,  $T = (0.5, 0, 0.5)$ ,  $V = (0.5, 0.5, 0.5)$ ,  $R = (0, 0.5, 0.5)$ ,  $Y =$   
 $(0, 0.5, 0)$ , **(2d)**  $X = (0.5, 0, 0)$ ,  $\Gamma=(0, 0, 0)$ ,  $Y=(0, 0.5, 0)$ ,  $D=(0, 0.5, 0.5)$ ,  $Z = (0, 0, 0.5)$ .



**Table S1.** Comparison of the selected bond lengths (Å) for compounds **2a-2d**.

| <b>2a</b> |          | <b>2b</b> |          |
|-----------|----------|-----------|----------|
| C7-N1     | 1.159(7) | C7-N1     | 1.138(7) |
| C8-N2     | 1.147(6) | C8-N2     | 1.148(7) |
| C4-I1     | 2.083(5) | C3-I1     | 2.085(5) |

| <b>2c</b> |           | <b>2d</b> |           |
|-----------|-----------|-----------|-----------|
| C7-N1     | 1.150(3)  | C8-N2     | 1.133(19) |
| C8-N2     | 1.170(2)  | C7-N1     | 1.128(17) |
| C4-I1     | 2.087(17) | C8a-N2a   | 1.121(15) |
| C3-I2     | 2.085(17) | C7a-N1a   | 1.132(18) |
|           |           | C5-I1     | 2.092(11) |
|           |           | C4-I2     | 2.087(13) |
|           |           | C5a-I1a   | 2.064(12) |
|           |           | C4a-I2a   | 2.097(13) |

**Table S2.** Geometric parameters used for the determination of the  $\pi\cdots\pi$  interactions between phenyl cycles. For compound **2c** the distances between centroids are presented for phenyl rings of **2c1** and **2c2** respectively.

| <b>d(CgI<math>\cdots</math>CgI')</b> |           | <b><math>\alpha</math></b> | <b><math>\beta</math></b> | <b>Symmetry transformation for CgI'.</b> |
|--------------------------------------|-----------|----------------------------|---------------------------|------------------------------------------|
| <b>1a</b>                            | 3.99      | 0                          | 26.5                      | <i>1/2-X,1/2-Y,-1/2-Z</i>                |
| <b>1b</b>                            | 4.16      | 0                          | 32.9                      | <i>X,-1+Y,Z</i>                          |
| <b>1c</b>                            | 4.204     | 0                          | 30.3                      | <i>X,Y,-1+Z</i>                          |
| <b>2a</b>                            | 4.493     | 0                          | 40.3                      | <i>-X,1-Y,-Z</i>                         |
|                                      | 4.356     | 0                          | 37.6                      | <i>1-X,2-Y,1-Z</i>                       |
| <b>2b</b>                            | 3.845     | 1.3                        | 24.6                      | <i>X,1/2-Y,-1/2+Z</i>                    |
|                                      | 3.846     | 1.3                        | 23.9                      | <i>X,1/2-Y,1/2+Z</i>                     |
| <b>2c</b>                            | 5.399(10) | 0                          | 48.4                      | <i>1-X,-Y,1-Z</i>                        |
|                                      | 5.158(10) | 0                          | 46.7                      | <i>1-X,1-Y,1-Z</i>                       |
| <b>2d</b>                            | 4.155(8)  | 0                          | 25.7                      | <i>X,-1+Y,Z</i>                          |
|                                      | 4.155(7)  | 0                          | 28.5                      | <i>X,-1+Y,Z</i>                          |

**Table S3.** Calculated parameters for C-(N, I)...Cg ( $\pi$ -ring) interactions analysis.

|           | C-N...CgI'     | N...CgI' | $\gamma$ | Symmetry transformation for CgI'. |
|-----------|----------------|----------|----------|-----------------------------------|
| <b>1b</b> | C7-N1...Cg(1)  | 3.8595   | 25.1     | $X, I+Y, Z$                       |
| <b>2a</b> | C7-N1...Cg(1)  | 3.657    | 21.42    | $I-X, 2-Y, I-Z$                   |
| <b>2c</b> | C4-I1... Cg(1) | 3.754    | 11.86    | $I-X, I-Y, I-Z$                   |
|           | C5-I2...Cg(1)  | 3.757    | 10.64    | $I-X, -Y, I-Z$                    |

**Table S4.** Donor-acceptor interaction energies  $E^2$  (kcal mol<sup>-1</sup>) and charge differences ( $e$ ) for halogen bonding.

| Compounds   | $\Delta q_I$ | $\Delta q_N$ | Delocalization                             | $E^{(2)}$ [kcal/mol] |
|-------------|--------------|--------------|--------------------------------------------|----------------------|
| <b>1a</b>   | -0.04        | 0.034        | LP(1)N1 $\rightarrow$ $\sigma^*$ (I1-C4)   | 3.58                 |
| <b>1b</b>   | -0.009       | -            | LP(3)I1 $\rightarrow$ $\sigma^*$ (C3-I1)   | 2.15                 |
| <b>1c</b>   | 0.004        | -            | LP(3)I1 $\rightarrow$ $\sigma^*$ (I1-C2)   | 2.5                  |
| <b>2a</b>   | -0.025       | 0.031        | LP(1)I1 $\rightarrow$ $\sigma^*$ (C8-N2)   | 1.76                 |
|             |              |              | $\sigma$ (C4-I1) $\rightarrow$ RY*(4)N2    | 1.49                 |
| <b>2b</b>   | -0.035       | 0.006        | $\sigma$ (C3-I1) $\rightarrow$ RY*(5)N2    | 2.12                 |
|             |              |              | LP(1)I1 $\rightarrow$ RY*(2)N2             | 1.96                 |
|             |              |              | LP(1)I1 $\rightarrow$ $\sigma^*$ (C8-N1)   | 1.84                 |
| <b>2c</b>   | 0.024        | -0.023       | $\sigma$ (C3-I2) $\rightarrow$ RY*(2)N1    | 1.88                 |
|             |              |              | LP(1)I2 $\rightarrow$ $\sigma^*$ (C7-N1)   | 1.78                 |
|             | 0.018        | -0.027       | $\sigma$ (C4-I1) $\rightarrow$ RY*(2)N2    | 2.14                 |
|             |              |              | LP(1)I1 $\rightarrow$ $\sigma^*$ (C8-N2)   | 1.75                 |
| <b>2d1S</b> | -0.024       | 0.012        | LP(1)N2 $\rightarrow$ $\sigma^*$ (C5-I1)   | 2.48                 |
| <b>2d1L</b> | -0.004       | -0,027       | LP(1)N2a $\rightarrow$ $\sigma^*$ (C4-I2)  | 1.35                 |
| <b>2d1I</b> | -0.009       | -            | LP(3)I1 $\rightarrow$ $\sigma^*$ (C5a-I1a) | 0.24                 |
| <b>2d1T</b> | 0.011        | 0.044        | $\sigma$ (C5-I1) $\rightarrow$ RY*(1)N2    | 2.08                 |
|             |              |              | $\sigma$ (C5-I1) $\rightarrow$ RY*(2)N2    | 1.61                 |
|             |              |              | $\sigma$ (C5-I1) $\rightarrow$ RY*(4)N2    | 1.36                 |
|             | -0.028       | -            | LP(1)I1 $\rightarrow$ RY*(4)I1a            | 1.32                 |
|             |              |              | LP(1)I1 $\rightarrow$ $\sigma^*$ (C5a-I1a) | 0.92                 |

**Table S5.** Electron Density,  $\rho$ , Laplacian,  $\nabla^2\rho$  (a.u.) at the halogen bonds' critical points and interaction energies ( $\Delta E$ , kcal/mol) in **1a-1c**, **2a-2c**, **2d1S**, **2d1L**, **2d1I**. For **2b** and **2c** the interaction energy in brackets denotes  $\Delta E$  per one XB while in **2d1S** and **2d1I** the two values for  $\Delta E$  refer to dimer and trimer respectively.

| Compounds   | XB              | $\rho$ | $\nabla^2\rho$ |
|-------------|-----------------|--------|----------------|
| <b>1a</b>   | I1 $\cdots$ N1  | 0.013  | 0.041          |
| <b>1b</b>   | I1 $\cdots$ I1  | 0.009  | 0.02           |
| <b>1c</b>   | I1 $\cdots$ I1  | 0.009  | 0.02           |
| <b>2a</b>   | I1 $\cdots$ N2  | 0.011  | 0.034          |
| <b>2b</b>   | I1 $\cdots$ N2  | 0.011  | 0.034          |
| <b>2c</b>   | I1 $\cdots$ N2  | 0.01   | 0.031          |
|             | I2 $\cdots$ N1  | 0.009  | 0.028          |
| <b>2d1S</b> | I1 $\cdots$ N2  | 0.012  | 0.038          |
| <b>2d1L</b> | I2 $\cdots$ N2a | 0.009  | 0.028          |
| <b>2d1I</b> | I1 $\cdots$ I1a | 0.011  | 0.027          |

**Table S6.** Natural charges and their differences ( $e$ ) for halogen bonding.

|              | Atoms | q(monomer) | q(dimer) | $\Delta q$ |
|--------------|-------|------------|----------|------------|
| <b>1a</b>    | I1    | 0.209      | 0.249    | -0.04      |
|              | N1    | -0.306     | -0.34    | 0.034      |
| <b>1b</b>    | I1    | 0.245      | 0.254    | -0.009     |
| <b>1c</b>    | I1    | 0.211      | 0.207    | 0.004      |
| <b>2a</b>    | I1    | 0.244      | 0.269    | -0.025     |
|              | N2    | -0.261     | -0.292   | 0.031      |
|              | N1    | -0.271     | -0.275   | 0.004      |
| <b>2b</b>    | I1    | 0.272      | 0.307    | -0.035     |
|              | N2    | -0.254     | -0.302   | 0.048      |
|              | N1    | -0.262     | -0.269   | 0.006      |
| <b>2c</b>    | I1    | 0.276      | 0.293    | 0.018      |
|              | N1    | -0.266     | -0.289   | -0.022     |
|              | I2    | 0.271      | 0.295    | 0.024      |
|              | N2    | -0.265     | -0.292   | -0.027     |
| <b>2d-1S</b> | I1    | 0.294      | 0.318    | -0.024     |
|              | N2    | -0.25      | -0.262   | 0.012      |
| <b>2d-1L</b> | I2    | 0.294      | 0.298    | -0.004     |
|              | N2a   | -0.26      | -0.287   | -0.027     |
| <b>2d-1I</b> | I1a   | 0.31       | 0.31     | 0.06       |
|              | I1    | 0.275      | 0.266    | -0.009     |
| <b>2d-1T</b> | I1a   | 0.294      | 0.322    | -0.028     |
|              | I1    | 0.31       | 0.32     | 0.011      |
|              | N2    | -0.25      | -0.294   | 0.044      |
